# Supplementary material for: Effect of iodide on the electronic and photoresponsive behaviors of 1D naphthalenediimide-based zinc coordination polymers
Source: Royal Society of Chemistry journal article supplement (doi:10.1039/d4ce00882k), 2024-01-01
Supplement: d4ce00882k1.pdf [file d4ce00882k1.pdf]

Electronic Supplementary Material (ESI) for CrystEngComm

This journal is © The Royal Society of Chemistry 2024

# The effect of iodide on electronic and photo-responsive behaviors of 1D naphthalenediimide-based zinc coordination polymers

Yifang Zhang, Ming Kang, Shimin Zhang, Bohong Gao, Pengfei Hao,\*

Junju Shen, Gaopeng Li and Yunlong Fu\*

*Key Laboratory of Magnetic Molecules & Magnetic Information Materials Ministry of Education, School of Chemical and Material Science, Shanxi Normal University, Taiyuan 030001, China*

*\*Corresponding author. Tel: +86-13835388909.*

*E-mail address: haopengfei\_2015@126.com; yunlongfu@sxnu.edu.cn.*

## Contents

|                                                                                                                                                                                                                          |   |
|--------------------------------------------------------------------------------------------------------------------------------------------------------------------------------------------------------------------------|---|
| <b>1. Figures</b> .....                                                                                                                                                                                                  | 2 |
| <b>Fig. S1</b> Coordination environment of Zn <sup>2+</sup> in <b>2-4</b> .....                                                                                                                                          | 2 |
| <b>Fig. S2</b> Thermo-gravimetric (TG) and Differential scanning calorimetry (DSC) curves of <b>1-4</b> ..                                                                                                               | 2 |
| <b>Fig. S3</b> Kubelka-Munk transformed reflectivity vs energy of complexes <b>1-4</b> .....                                                                                                                             | 3 |
| <b>Fig. S4</b> The EPR spectra of <b>1</b> and <b>1P</b> (a), <b>2</b> , <b>2P</b> and <b>2P</b> -heating (b), <b>3</b> , <b>3P</b> and <b>3P</b> -heating (c) and <b>4</b> , <b>4P</b> and <b>4P</b> -heating (d) ..... | 3 |
| <b>Fig. S5</b> PXRD patterns of <b>1-4</b> simulated from the X-ray single-crystal structures, as-synthesized samples and after irradiation samples. ....                                                                | 4 |
| <b>Fig. S6</b> FT-IR spectra of <b>1-4</b> as-synthesized samples and after irradiation samples. ....                                                                                                                    | 4 |
| <b>2. Tables</b> .....                                                                                                                                                                                                   | 5 |
| <b>Table S1</b> Crystallographic data and refinement of <b>1-4</b> . ....                                                                                                                                                | 5 |
| <b>Table S2</b> Selected bond lengths (Å) and angles (°) for <b>1-4</b> . ....                                                                                                                                           | 6 |

## 1. Figures

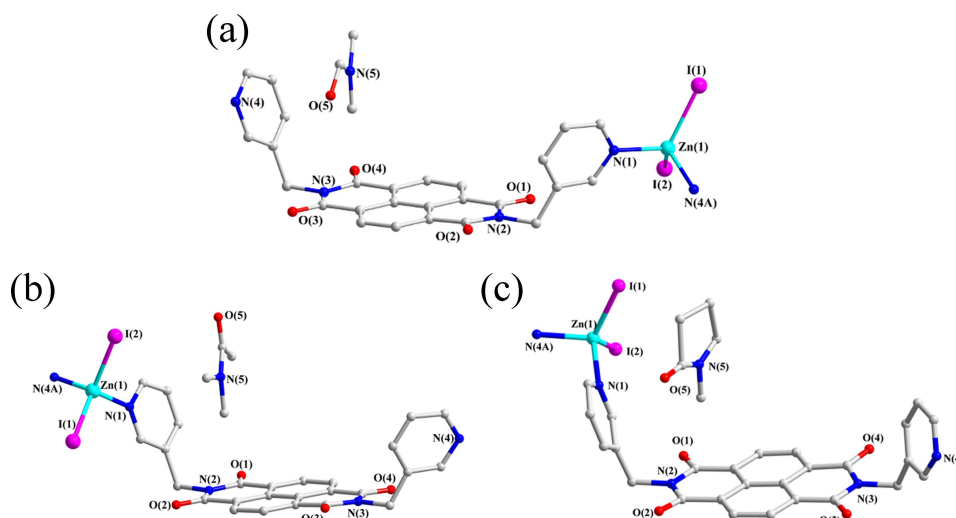

**Fig. S1** (a) Coordination environment of  $Zn^{2+}$  in **2** (symmetry codes: A:  $0.5+x, 0.5-y, -0.5+z$ ); (b) Coordination environment of  $Zn^{2+}$  in **3** (symmetry codes: A:  $-0.5+x, 1.5-y, 0.5+z$ ); (c) Coordination environment of  $Zn^{2+}$  in **4** (symmetry codes: A:  $-0.5+x, 1.5-y, 0.5+z$ ); All hydrogen atoms are omitted for clarity.

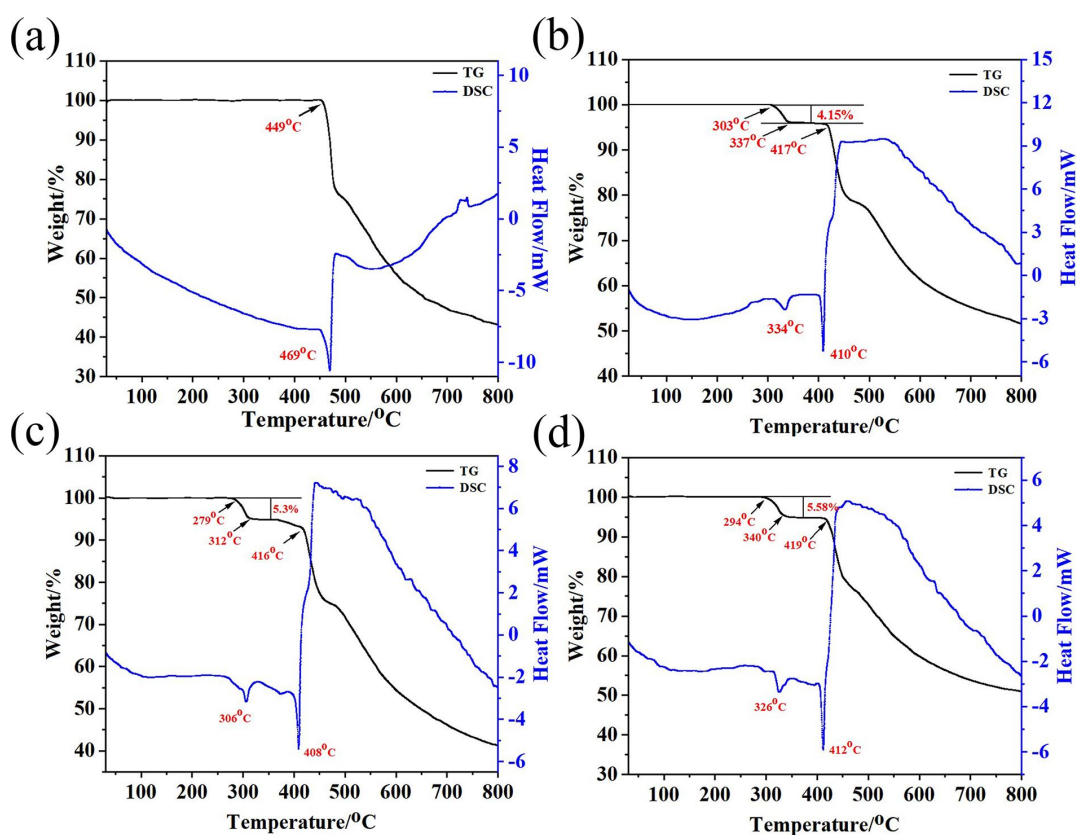

**Fig. S2** Thermo-gravimetric (TG) and Differential scanning calorimetry (DSC) curves of **1-4**.

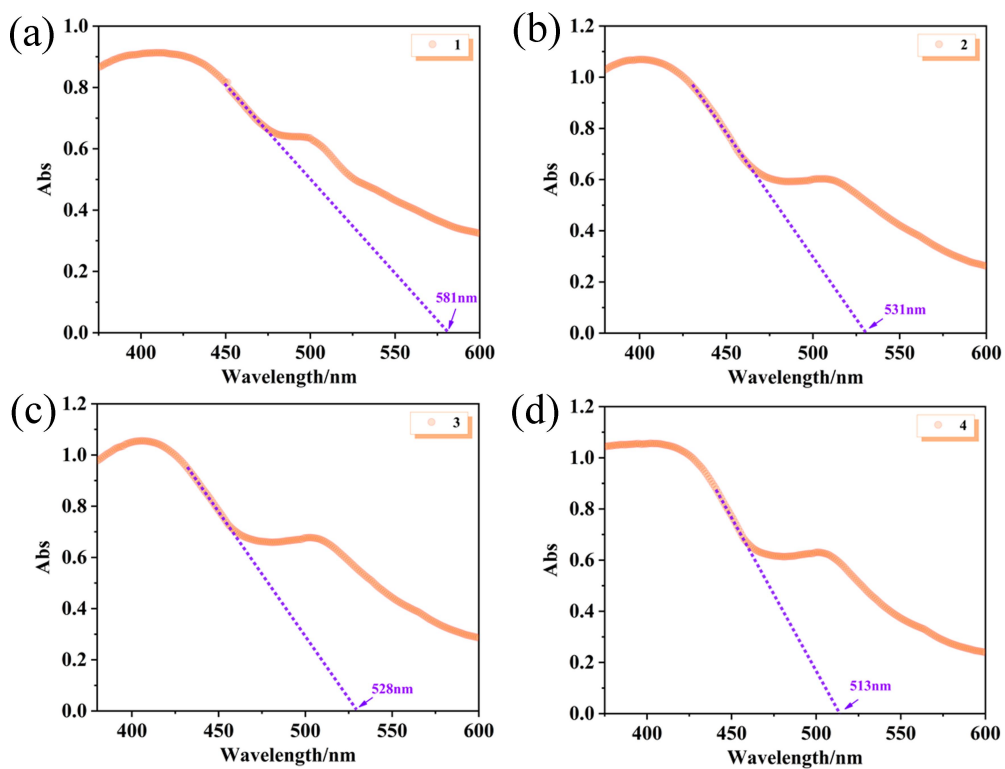

**Fig. S3** Kubelka-Munk transformed reflectivity vs energy of complexes 1-4.

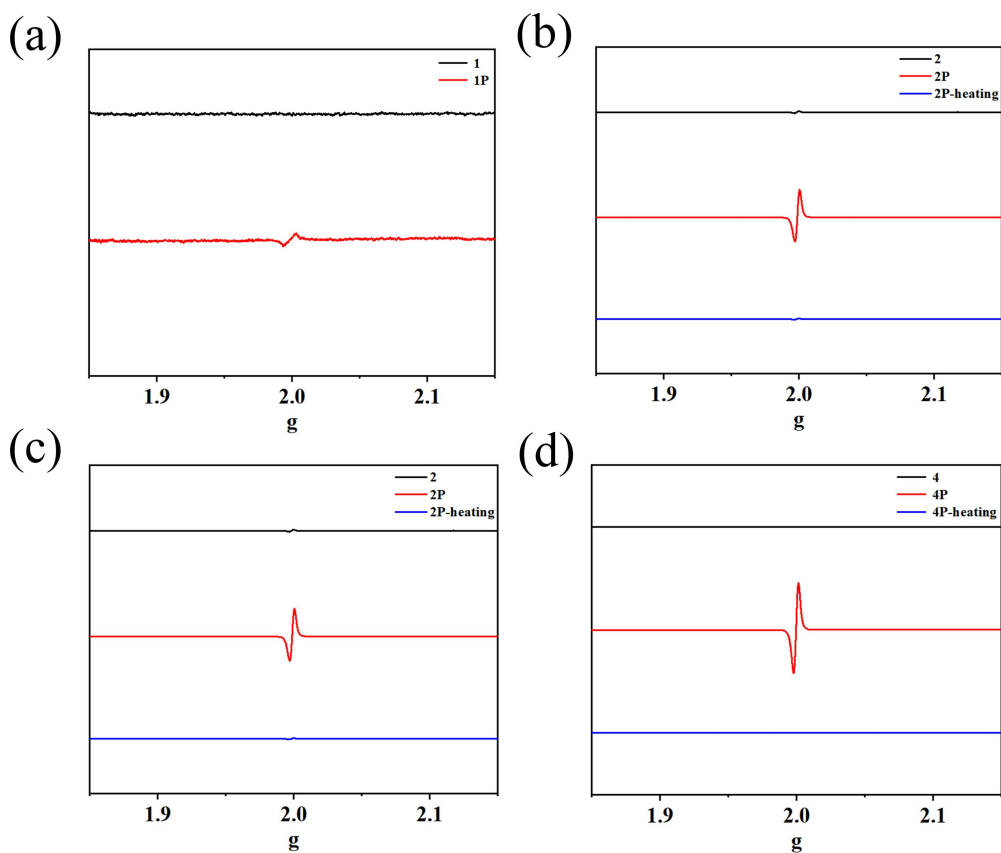

**Fig. S4** The EPR spectra of 1 and 1P (a), 2, 2P and 2P-heating (b), 3, 3P and 3P-heating (c) and 4, 4P and 4P-heating (d).

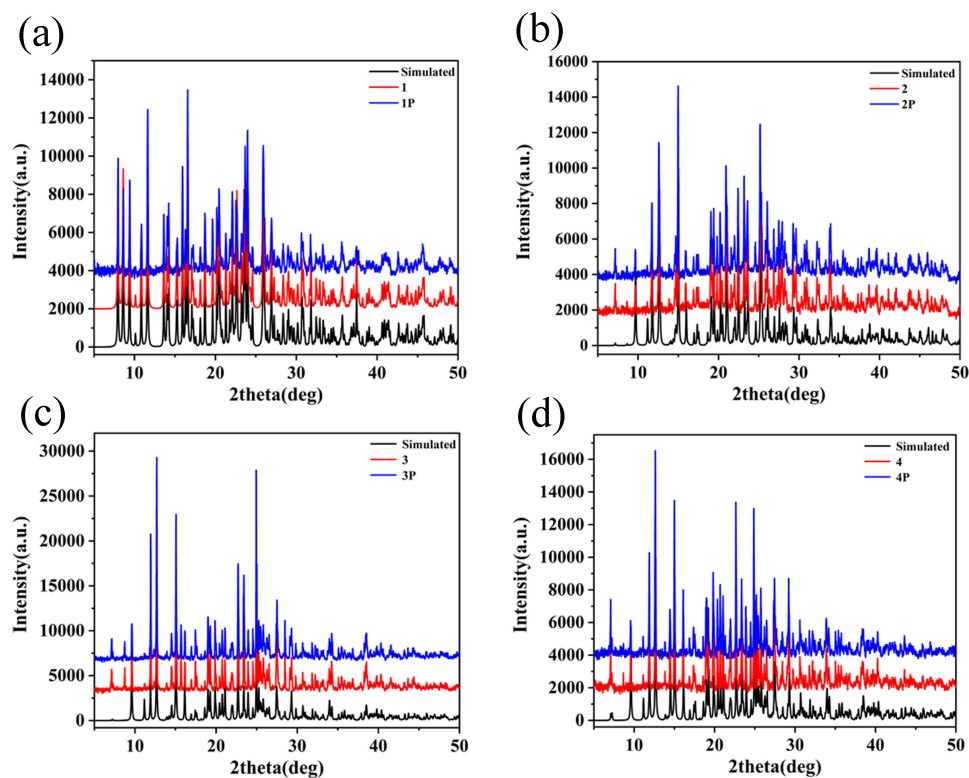

**Fig. S5** PXRD patterns of **1-4** simulated from the X-ray single-crystal structures, as-synthesized samples and after irradiation samples.

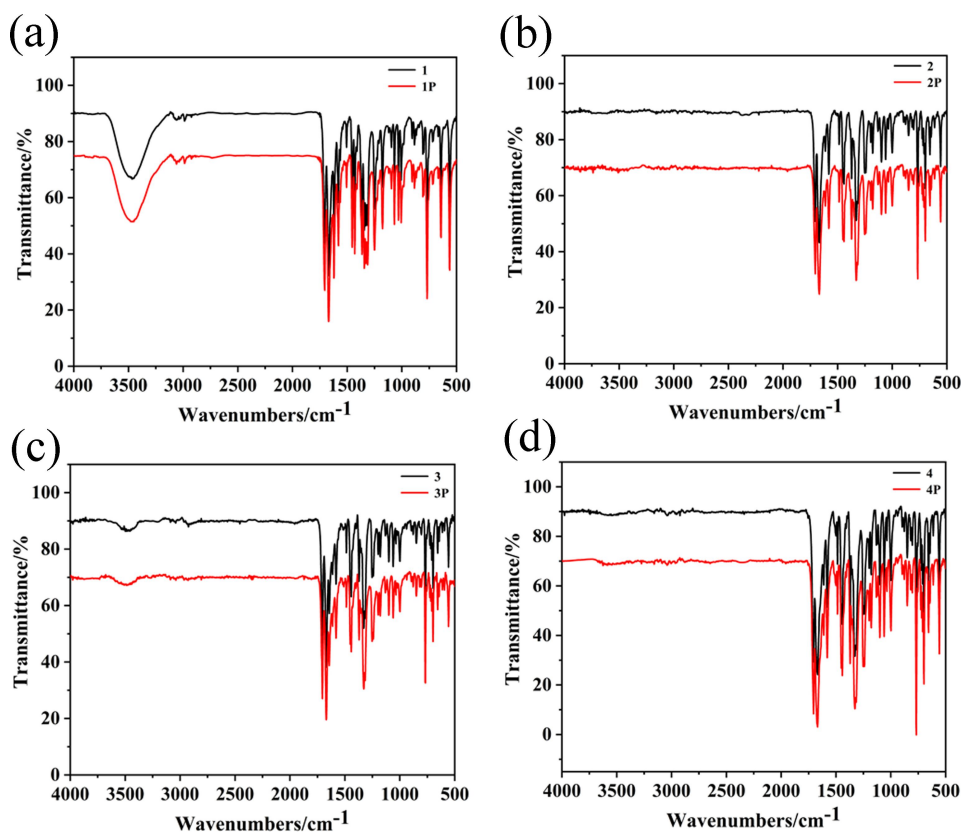

**Fig. S6** FT-IR spectra of **1-4** as-synthesized samples and after irradiation samples.

## 2. Tables

**Table S1** Crystallographic data and refinement of **1-4**.

| Compound                                                                                     | <b>1</b>                                                                        | <b>2</b>                                                                                     | <b>3</b>                                                                                     | <b>4</b>                                                                                     |
|----------------------------------------------------------------------------------------------|---------------------------------------------------------------------------------|----------------------------------------------------------------------------------------------|----------------------------------------------------------------------------------------------|----------------------------------------------------------------------------------------------|
| CCDC code                                                                                    | 2349645                                                                         | 2349646                                                                                      | 2349647                                                                                      | 2349648                                                                                      |
| Temperature (K)                                                                              | 293(2)                                                                          | 293(2)                                                                                       | 293(2)                                                                                       | 293(2)                                                                                       |
| Empirical formula                                                                            | C <sub>26</sub> H <sub>16</sub> I <sub>2</sub> N <sub>4</sub> O <sub>4</sub> Zn | C <sub>55</sub> H <sub>39</sub> I <sub>4</sub> N <sub>9</sub> O <sub>9</sub> Zn <sub>2</sub> | C <sub>56</sub> H <sub>41</sub> I <sub>4</sub> N <sub>9</sub> O <sub>9</sub> Zn <sub>2</sub> | C <sub>57</sub> H <sub>41</sub> I <sub>4</sub> N <sub>9</sub> O <sub>9</sub> Zn <sub>2</sub> |
| Formula weight                                                                               | 767.60                                                                          | 1608.29                                                                                      | 1622.32                                                                                      | 1634.33                                                                                      |
| Crystal system                                                                               | triclinic                                                                       | monoclinic                                                                                   | monoclinic                                                                                   | monoclinic                                                                                   |
| Space group                                                                                  | <i>P</i> -1                                                                     | <i>C</i> 2/ <i>c</i>                                                                         | <i>C</i> 2/ <i>c</i>                                                                         | <i>C</i> 2/ <i>c</i>                                                                         |
| <i>a</i> (Å)                                                                                 | 10.1573(9)                                                                      | 25.3483(17)                                                                                  | 25.493(4)                                                                                    | 25.494(3)                                                                                    |
| <i>b</i> (Å)                                                                                 | 12.2406(11)                                                                     | 13.9149(8)                                                                                   | 13.949(3)                                                                                    | 13.9506(19)                                                                                  |
| <i>c</i> (Å)                                                                                 | 12.6327(12)                                                                     | 16.2708(10)                                                                                  | 16.199(3)                                                                                    | 16.205(2)                                                                                    |
| $\alpha$ (°)                                                                                 | 115.380(2)                                                                      | 90                                                                                           | 90                                                                                           | 90                                                                                           |
| $\beta$ (°)                                                                                  | 93.680(3)                                                                       | 103.754(3)                                                                                   | 102.121(6)                                                                                   | 102.081(5)                                                                                   |
| $\gamma$ (°)                                                                                 | 107.830(2)                                                                      | 90                                                                                           | 90                                                                                           | 90                                                                                           |
| <i>V</i> (Å <sup>3</sup> )                                                                   | 1315.6(2)                                                                       | 5574.5(6)                                                                                    | 5631.9(17)                                                                                   | 5636.0(13)                                                                                   |
| <i>Z</i>                                                                                     | 2                                                                               | 4                                                                                            | 4                                                                                            | 4                                                                                            |
| <i>D<sub>c</sub></i> (g cm <sup>-3</sup> )                                                   | 1.938                                                                           | 1.916                                                                                        | 1.913                                                                                        | 1.926                                                                                        |
| $\mu$ (mm <sup>-1</sup> )                                                                    | 3.320                                                                           | 3.140                                                                                        | 3.109                                                                                        | 3.108                                                                                        |
| <i>F</i> (000)                                                                               | 736.0                                                                           | 3104.0                                                                                       | 3136.0                                                                                       | 3160.0                                                                                       |
| Reflections collected                                                                        | 21144                                                                           | 50128                                                                                        | 41656                                                                                        | 50537                                                                                        |
| Independent reflections                                                                      | 6510                                                                            | 6898                                                                                         | 7088                                                                                         | 6992                                                                                         |
| <i>R</i> <sub>int</sub>                                                                      | 0.0382                                                                          | 0.0570                                                                                       | 0.0471                                                                                       | 0.0448                                                                                       |
| Goodness-of-fit on <i>F</i> <sup>2</sup>                                                     | 1.005                                                                           | 0.961                                                                                        | 1.018                                                                                        | 0.932                                                                                        |
| <i>R</i> <sub>1</sub> / <i>wR</i> <sub>2</sub> , [ <i>I</i> ≥ 2σ( <i>I</i> )] <sup>a,b</sup> | 0.0465/0.0805                                                                   | 0.0445/0.1268                                                                                | 0.0426/0.0825                                                                                | 0.0373/0.1142                                                                                |
| <i>R</i> <sub>1</sub> / <i>wR</i> <sub>2</sub> , (all data)                                  | 0.1023/0.0957                                                                   | 0.0870/0.1501                                                                                | 0.0791/0.0939                                                                                | 0.0629/0.1334                                                                                |

$$^a R_1 = \sum ||F_o| - |F_c|| / \sum |F_o|$$

$$^b wR_2 = [\sum w(F_o^2 - F_c^2)^2 / \sum w(F_o^2)^2]^{1/2}$$

**Table S2** Selected bond lengths (Å) and angles (°) for **1-4**.

| Compound 1 |            |            |           |
|------------|------------|------------|-----------|
| Zn1-I2     | 2.5508(8)  | Zn1-N1     | 2.0699(4) |
| Zn1-I1     | 2.5217(6)  | Zn1-N3     | 2.0518(3) |
| I1-Zn1-I2  | 119.94(2)  | N3-Zn1-N1  | 98.10(15) |
| N1-Zn1-I2  | 106.04(10) | C5-N1-Zn1  | 120.63(3) |
| N1-Zn1-I1  | 108.02(10) | C1-N1-Zn1  | 121.97(2) |
| N3-Zn1-I2  | 105.21(11) | C18-N3-Zn1 | 125.09(3) |
| N3-Zn1-I1  | 116.89(10) | C14-N3-Zn1 | 117.76(3) |

  

| Compound 2  |            |              |           |
|-------------|------------|--------------|-----------|
| Zn1-I1      | 2.5332(6)  | Zn1-N1       | 2.0683(3) |
| Zn1-I2      | 2.5301(6)  | Zn1-N4#1     | 2.0536(3) |
| N1-Zn1-I1   | 109.03(11) | I2-Zn1-I1    | 120.34(3) |
| N1-Zn1-I2   | 109.86(11) | C5-N1-Zn1    | 117.76(3) |
| N4#1-Zn1-N1 | 99.23(15)  | C1-N1-Zn1    | 124.30(3) |
| N4#1-Zn1-I1 | 106.30(11) | C23-N4-Zn1#2 | 124.09(3) |
| N4#1-Zn1-I2 | 109.97(10) | C24-N4-Zn1#2 | 117.63(3) |

#1  $1/2+x, 1/2-y, -1/2+z$ ; #2  $-1/2+x, 1/2-y, 1/2+z$

  

| Compound 3  |           |              |           |
|-------------|-----------|--------------|-----------|
| Zn1-I2      | 2.5396(7) | Zn1-N1       | 2.0541(3) |
| Zn1-I1      | 2.5308(7) | Zn1-N4#1     | 2.0667(3) |
| I1-Zn1-I2   | 120.29(2) | N4#1-Zn1-I1  | 109.34(9) |
| N1-Zn1-I2   | 107.83(9) | C5-N1-Zn1    | 124.54(2) |
| N1-Zn1-I1   | 109.61(9) | C1-N1-Zn1    | 117.38(2) |
| N1-Zn1-N4#1 | 99.21(13) | C23-N4-Zn1#2 | 118.04(3) |
| N4#1-Zn1-I2 | 108.50(9) | C24-N4-Zn1#2 | 124.10(3) |

#1  $-1/2+x, 3/2-y, 1/2+z$ ; #2  $1/2+x, 3/2-y, -1/2+z$

  

| Compound 4 |           |          |           |
|------------|-----------|----------|-----------|
| Zn1-I1     | 2.5423(6) | Zn1-N1   | 2.0531(3) |
| Zn1-I2     | 2.5319(6) | Zn1-N4#1 | 2.0696(3) |

|             |           |              |           |
|-------------|-----------|--------------|-----------|
| I2-Zn1-I1   | 120.21(2) | N4#1-Zn1-I2  | 109.50(9) |
| N1-Zn1-I1   | 107.77(9) | C5-N1-Zn1    | 124.30(2) |
| N1-Zn1-I2   | 109.50(9) | C1-N1-Zn1    | 117.23(3) |
| N1-Zn1-N4#1 | 99.13(12) | C23-N4-Zn1#2 | 117.89(2) |
| N4#1-Zn1-I1 | 108.66(9) | C24-N4-Zn1#2 | 123.68(2) |

---

#1  $-1/2+x, 3/2-y, 1/2+z$ ; #2  $1/2+x, 3/2-y, -1/2+z$

---
